# Supplementary material
Source: PubMed Central journal article supplement (PMC3494932)
Supplement: 1215991109_pnas.201215991SI.pdf [file 1215991109_pnas.201215991SI.pdf]

# Supporting Information

Keeler et al. 10.1073/pnas.1215991109

## SI Text

Below is a list of references for case studies, research papers, models, or illustrative examples to support application of the water quality valuation template presented in Fig. 3.

### Lake Recreation. Relationship between phosphorus loading and lake water clarity.

1. Canfield DE, Jr., Bachmann RW (1981) Prediction of total phosphorus concentrations, chlorophyll *a*, and secchi depths in natural and artificial lakes. *Can J Fish Aquat Sci* 38:414–423.
2. Carlson RE (1977) A trophic state index for lakes. *Limnol Oceanogr* 22:361–369.
3. Dillon P, Rigler F (1974) The phosphorus-chlorophyll relationship in lakes. *Limnol Oceanogr* 19:767–773.
4. Heiskary SA, Walker WW, Jr. (1988) Developing phosphorus criteria for Minnesota lakes. *Lake Reserv Manage* 4:1–9.
5. Smith VH, Shapiro J (1981) Chlorophyll-phosphorus relations in individual lakes. Their importance to lake restoration strategies. *Environ Sci Technol* 15:444–451.
6. Sterner RW (2008) On the phosphorus limitation paradigm for lakes. *Int Rev Hydrobiol* 93:433–445.
7. Vollenweider RA (1970) Scientific fundamentals of the eutrophication of lakes and flowing waters, with particular reference to nitrogen and phosphorus as factors in eutrophication. *OECD Report, September 1970.159 P.*
8. Vollenweider RA (1976) Advances in defining critical loading levels for phosphorus in lake eutrophication. *Mem Ital Idrobiol* 33:53–83.
9. Wagner T, Soranno PA, Webster KE, Cheruvilil KS (2011) Landscape drivers of regional variation in the relationship between total phosphorus and chlorophyll in lakes. *Freshwat Biol* 56:1811–1824.
10. Bryhn AC, L Hakanson (2007) A comparison of predictive phosphorus load-concentration models for lakes. *Ecosystems* 10:1084–1099.
11. Nurnberg GK (2009) Assessing internal phosphorus load—problems to be solved. *Lake Reserv Manag* 25:419–432.

### Valuation of changes in water quality: Recreational demand models.

12. Bockstael NE, Hanemann WM, Kling CL (1987) Estimating the value of water quality improvements in a recreational demand framework. *Water Resour Res* 23:951–960.
13. Bockstael NE, McConnell KE, Strand I (1989) Measuring the benefits of improvements in water quality: The Chesapeake Bay. *Mar Resour Econ* 6:1–18.
14. Bockstael N, McConnell K (2007) *Environmental and Resource Valuation with Revealed Preferences: A Theoretical Guide to Empirical Models*, ed Bateman IJ (Springer, Dordrecht, The Netherlands), Vol 7.
15. Parsons GR, Kealy MJ (1992) Randomly drawn opportunity sets in a random utility model of lake recreation. *Land Econ* 68:93–106.
16. Egan KJ, Herriges JA, Kling CL, Downing JA (2009) Valuing water quality as a function of water quality measures. *Am J Agric Econ* 91:106–123.
17. Phaneuf DJ (2002) A random utility model for total maximum daily loads: Estimating the benefits of watershed-based ambient water quality improvements. *Water Resour Res* 38:1–11.

18. Phaneuf DJ, Smith VK (2005) Recreation demand models. *Handb Environ Econ* 2:671–761.
19. Phaneuf DJ, Kling CL, Herriges JA (2000) Estimation and welfare calculations in a generalized corner solution model with an application to recreation demand. *Rev Econ Stat* 82: 83–92.
20. Huang J, Haab T, Whitehead J (1997) Willingness to pay for quality improvements: Should revealed and stated preference data be combined? *J Environ Econ Manage* 34:240–255.
21. Vesterinen J, Pouta E, Huhtala A, Neuvonen M (2010) Impacts of changes in water quality on recreation behavior and benefits in Finland. *J Environ Manage* 91:984–994.

### Valuation of changes in water quality: Willingness to pay for recreation (contingent valuation).

22. Carson RT, Mitchell RC (1993) The value of clean water: The public's willingness to pay for boatable, fishable, and swimmable quality water. *Water Resour Res* 29:2445–2454.
23. Viscusi WK, Huber J, Bell J (2008) The economic value of water quality. *Environ Resour Econ* 41:169–187.
24. Magat WA, Huber J, Viscusi WK, Bell J (2000) An iterative choice approach to valuing clean lakes, rivers, and streams. *J Risk Uncertainty* 21:7–43.
25. Johnston R, et al. (2005) Systematic variation in willingness to pay for aquatic resource improvements and implications for benefit transfer: A meta-analysis. *Can J Agr Econ* 53:221–248.
26. Van Houtven G, Powers J, Pattanayak SK (2007) Valuing water quality improvements in the United States using meta-analysis: Is the glass half-full or half-empty for national policy analysis? *Resour Energy Econ* 29:206–228.
27. Johnston RJ, Ranson MH, Besedin EY, Helm EC (2006) What determines willingness to pay per fish? A meta-analysis of recreational fishing values. *Mar Resour Econ* 21:1–32.

### Valuation of changes in lake water clarity: Hedonic pricing models.

28. Steinnes D (1992) Measuring the economic value of water-quality: The case of lakeshore land. *Ann Reg Sci* 26:171–176.
29. Epp D, Alani K (1979) Effect of water-quality on rural non-farm residential property values. *Am J Agr Econ* 61:529–534.
30. Michael H, Boyle K, Bouchard R (2000) Does the measurement of environmental quality affect implicit prices estimated from hedonic models? *Land Econ* 76:283–298.
31. Poor PJ, Pessagno KL, Paul RW (2007) Exploring the hedonic value of ambient water quality: A local watershed-based study. *Ecol Econ* 60:797–806.
32. Poor P, Boyle K, Taylor L, Bouchard R (2001) Objective versus subjective measures of water clarity in hedonic property value models. *Land Econ* 77:482–493.
33. Anderson ST, West SE (2006) Open space, residential property values, and spatial context. *Regional Sci Urban Econ* 36:773–789.
34. Cho S, Roberts RK, Kim SG (2011) Negative externalities on property values resulting from water impairment: The case of the pigeon river watershed. *Ecol Econ* 70:2390–2399.
35. Phaneuf DJ, Smith VK, Palmquist RB, Pope JC (2008) Integrating property value and local recreation models to value ecosystem services in urban watersheds. *Land Econ* 84:361–381.

36. Walsh PJ, Milon JW, Scrogin DO (2011) The spatial extent of water quality benefits in urban housing markets. *Land Econ* 87:628–644.
37. Loomis J, Feldman M (2003) Estimating the benefits of maintaining adequate lake levels to homeowners using the hedonic property method. *Water Resour Res* 39:1259–1264.
38. Leggett C, Bockstael N (2000) Evidence of the effects of water quality on residential land prices. *J Environ Econ Manage* 39:121–144.

#### General reviews of water quality valuation models and methods.

39. Wilson MA, Carpenter SR (1999) Economic valuation of freshwater ecosystem services in the United States: 1971–1997. *Ecol Appl* 9:772–783.
40. Dumas CF, Schuhman PW, Whitehead JC (2005) Measuring the economic benefits of water quality improvement with benefit transfer: An introduction for noneconomists *Effects of Urbanization on Stream Ecosystems*, ed Brown LR, et al. (American Fisheries Society, Bethesda), pp 53–68.
41. Koteen J, Alexander SJ, Loomis JB (2002) Evaluating benefits and costs of changes in water quality. *USDA Forest Service General Technical Report Pacific Northwest Research Station* (US Department of Agriculture Forest Service, Pacific Northwest Research Station, Portland, OR). Available at: <http://www.fs.fed.us/pnw/pubs/gtr548.pdf>. Accessed October 8, 2012.
42. Mendelsohn R, Olmstead S (2009) The economic valuation of environmental amenities and disamenities: Methods and applications. *Annu Rev Environ Resour* 34:325–347.
43. Dodds WK, et al. (2009) Eutrophication of US freshwaters: Analysis of potential economic damages. *Environ Sci Technol* 43:12–19.
44. Olmstead SM (2010) The economics of water quality. *Rev Environ Econ Policy* 4:44–62.
45. Griffiths C, et al. (2012) US Environmental Protection Agency valuation of surface water quality improvements. *Rev Environ Econ Policy* 6:130–146.
46. Iovanna R, Griffiths C (2006) Clean water, ecological benefits, and benefits transfer: A work in progress at the US EPA. *Ecol Econ* 60:473–482.
47. Freeman AM, III (2006) Valuing environmental health effects—an economic perspective. *Environ Resour Econ* 34:347–363.
48. Corrigan JR, Egan KJ, Downing JA (2007) *Aesthetic Values of Lakes and Rivers. Working Papers* (Department of Economics, Kenyon College, Gambier, OH). Available at <http://ideas.repec.org/p/ken/wpaper/0701.html>. Accessed October 8, 2012.
49. Brauman KA, Daily GC, Duarte TK, Mooney HA (2007) The nature and value of ecosystem services: An overview highlighting hydrologic services. *Annu Rev Environ Resour* 32:67–98.

#### Clean Drinking Water. Avoided treatment costs for nitrate in drinking water.

50. Hernandez-Sancho F, Senante MM, Sala-Garrido R (2009) Environmental benefits of wastewater treatment: An economic valuation. *Risk Manage Water Supply Sanitation Systems* 251–260.
51. Hanley N (1990) The economics of nitrate pollution. *Eur Rev Agr Econ* 17:129–151.
52. Kapoor A, Viraraghavan T (1997) Nitrate removal from drinking water—review. *J Environ Eng ASCE* 123:371–380.

53. Moore E, et al. (2011) *The Human Costs of Nitrate-Contaminated Drinking Water in the San Joaquin Valley* (Pacific Institute, Oakland, CA).

#### Avoided treatment costs for nitrate in groundwater wells.

54. Lewandowski A, Montgomery B, Rosen C, Moncrief J (2008) Groundwater nitrate contamination costs: A survey of private well owners. *J Soil Water Conserv* 63:153–161.
55. Ledoux E, et al. (2007) Agriculture and groundwater nitrate contamination in the Seine basin. The STICS–MODCOU modeling chain. *Sci Total Environ* 375:33–47.

#### Health risks associated with nitrate in drinking water.

56. Ward MH, et al. (2011) Ingestion of nitrate and nitrite and risk of stomach cancer in the NIH-AARP diet and health study. *Epidemiology* 22:S107–S108.
57. Ward MH, et al. (2010) Nitrate intake and the risk of thyroid cancer and thyroid disease. *Epidemiology* 21:389–395.
58. Cantor KP (1997) Drinking water and cancer. *Cancer Causes and Control* 8:292–308.
59. Ward MH, Heineman EF, Markin RS, Weisenburger DD (2008) Adenocarcinoma of the stomach and esophagus and drinking water and dietary sources of nitrate and nitrite. *Int J Occupation Environ Health* 14:193–197.
60. Ward MH, Rusiecki JA, Lynch CF, Cantor KP (2007) Nitrate in public water supplies and the risk of renal cell carcinoma. *Cancer Causes Control* 18:1141–1151.
61. Ward M, Cantor K, Riley D, Merkle S, Lynch C (2003) Nitrate in public water supplies and risk of bladder cancer. *Epidemiology* 14:183–190.
62. Weyer P, et al. (2001) Municipal drinking water nitrate level and cancer risk in older women: The Iowa Women’s Health Study. *Epidemiology* 12:327–338.
63. Townsend AR, et al. (2003) Human health effects of a changing global nitrogen cycle. *Front Ecol Environ* 1:240–246.
64. Camargo JA, Alonso A (2006) Ecological and toxicological effects of inorganic nitrogen pollution in aquatic ecosystems: A global assessment. *Environ Int* 32:831–849.
65. Bouchard D, Williams M, Surampalli R (1992) Nitrate contamination of groundwater—sources and potential health-effects. *J Am Water Works Assoc* 84:85–90.

#### Valuation of health risks due to drinking water quality.

66. van Grinsven HJM, Rabl A, de Kok TM (2010) Estimation of incidence and social cost of colon cancer due to nitrate in drinking water in the EU: A tentative cost-benefit assessment. *Environ Health* 9:58.
67. Viscusi W, Aldy J (2003) The value of a statistical life: A critical review of market estimates throughout the world. *J Risk Uncertainty* 27:5–76.
68. Aldy JE, Viscusi WK (2008) Adjusting the value of a statistical life for age and cohort effects. *Rev Econ Stat* 90:573–581.
69. Kuchler R, Golan E (1999) *Assigning Values to Life: Comparing Methods for Valuing Health. Agricultural Economic Report No. 784*. (Food and Rural Economics Division, Economic Research Service, US Department of Agriculture, Washington, DC).

#### Commercial Fisheries. Relationship between nutrient loading and coastal fish and shellfish productivity.

70. Breitbart DL, Hondorp DW, Davias LA, Diaz RJ (2009) Hypoxia, nitrogen, and fisheries: Integrating effects across local and global landscapes. *Annu Rev Mar Sci* 1:329–349.

71. Huang L, Smith MD (2011) Management of an annual fishery in the presence of ecological stress: The case of shrimp and hypoxia. *Ecol Econ* 70:688–697.
72. Huang L, Smith MD, Craig JK (2010) Quantifying the economic effects of hypoxia on a fishery for brown shrimp *farfantepenaeus aztecus*. *Mar Coastal Fisheries Dynamics Manage Ecosystem Sci* 2:232–248.
73. Diaz RJ, Rosenberg R (2011) Introduction to environmental and economic consequences of hypoxia. *Int J Water Resour Dev* 27:71–82.

**Coastal Recreation. Relationship between nutrient loading and algal blooms.**

74. Cloern J (2001) Our evolving conceptual model of the coastal eutrophication problem. *Mar Ecol Progress Ser* 210:223–253.
75. Heisler J, et al. (2008) Eutrophication and harmful algal blooms: A scientific consensus. *Harmful Algae* 8:3–13.
76. Anderson DM, Glibert PM, Burkholder JAM (2002) Harmful algal blooms and eutrophication: Nutrient sources, composition, and consequences. *Estuaries Coasts* 25:704–726.
77. Bricker SB, et al. (2008) Effects of nutrient enrichment in the nation's estuaries: A decade of change. *Harmful Algae* 8:21–32.
78. Hudnell HK (2010) The state of US freshwater harmful algal blooms assessments, policy and legislation. *Toxicol* 55:1024–1034.
79. Garnier J, et al. (2010) N: P: Si nutrient export ratios and ecological consequences in coastal seas evaluated by the ICEP approach. *Global Biogeochem Cycles* 24:GB0A05.

**Valuation models for coastal recreation.**

80. Hoagland P, Anderson D, Kaoru Y, White A (2002) The economic effects of harmful algal blooms in the United States: Estimates, assessment issues, and information needs. *Estuaries Coasts* 25:819–837.
81. Larkin SL, Adams CM (2007) Harmful algal blooms and coastal business: Economic consequences in Florida. *Soc Nat Resour* 20:849–859.
82. Hoagland P, Scatasta S (2006) The economic effects of harmful algal blooms. *Ecol Harmful Algae* 391–402.
83. Freeman AM (1995) The benefits of water quality improvements for marine recreation: A review of the empirical evidence. *Mar Resour Econ* 10:385–406.
84. Pendleton L, Martin N, Webster D (2001) Public perceptions of environmental quality: A survey study of beach use and perceptions in Los Angeles county. *Mar Pollut Bull* 42:1155–1160.

**Safe Contact with Recreation Water. Relationship between nutrient loading and disease or irritation.**

85. Johnson PTJ, et al. (2010) Linking environmental nutrient enrichment and disease emergence in humans and wildlife. *Ecol Appl* 20:16–29.
86. Falconer I (1999) An overview of problems caused by toxic blue-green algae (cyanobacteria) in drinking and recreational water. *Environ Toxicol* 14:5–12.
87. Wade TJ, et al. (2010) Rapidly measured indicators of recreational water quality and swimming-associated illness at marine beaches: A prospective cohort study. *Environ Health* 9:66.
88. Wade T, et al. (2006) Rapidly measured indicators of recreational water quality are predictive of swimming-associated gastrointestinal illness. *Environ Health Perspect* 114:24–28.

89. Seyfried P, Tobin R, Brown N, Ness P (1985) A prospective study of swimming-related illness, morbidity and the microbiological quality of water. *Am J Public Health* 75:1071–1075.
90. Cabelli V (1989) Swimming-associated illness and recreational water-quality criteria. *Water Sci Technol* 21:13–21.

**Valuation of impacts or avoidance behaviors associated with aquatic pests and parasites.**

91. Leshem E, Maor Y, Meltzer E, Assous M, Schwartz E (2008) Acute schistosomiasis outbreak: Clinical features and economic impact. *Clin Infect Dis* 47:1499–1506.
92. Dwight R, Fernandez L, Baker D, Semenza J, Olson B (2005) Estimating the economic burden from illnesses associated with recreational coastal water pollution—A case study in Orange County, California. *J Environ Manage* 76:95–103.

**Coldwater Angling. Relationship between stream temperature and trout populations.**

93. Isaak DJ, Hubert WA (2004) Nonlinear response of trout abundance to summer stream temperatures across a thermally diverse montane landscape. *Trans Am Fish Soc* 133:1254–1259.
94. Wenger SJ, et al. (2011) Role of climate and invasive species in structuring trout distributions in the interior Columbia River Basin, USA. *Can J Fish Aquat Sci* 68:988–1008.
95. Isaak D, Hubert W (2001) A hypothesis about factors that affect maximum summer stream temperatures across montane landscapes. *J Am Water Resour Assoc* 37:351–366.
96. Wehrly KE, Wang L, Mitro M (2007) Field-based estimates of thermal tolerance limits for trout: Incorporating exposure time and temperature fluctuation. *Trans Am Fish Soc* 136:365–374.
97. Creque SM, Rutherford ES, Zorn TG (2005) Use of GIS-derived landscape-scale habitat features to explain spatial patterns of fish density in Michigan rivers. *N Am J Fish Manage* 25:1411–1425.
98. Steen PJ, Zorn TG, Seelbach PW, Schaeffer JS (2008) Classification tree models for predicting distributions of Michigan stream fish from landscape variables. *Trans Am Fish Soc* 137:976–996.

**Valuation of changes in trout abundance or habitat suitability.**

99. McKean JR, Johnson D, Taylor RG (2010) Willingness-to-pay for steelhead trout fishing: Implications of two-step consumer decisions with short-run endowments. *Water Resour Res* 46:W09523.
100. Dalton RS, Bastian CT, Jacobs JJ, Wesche TA (1998) Estimating the economic value of improved trout fishing on Wyoming streams. *N Am J Fish Manage* 18:786–797.
101. Harris A (2010) *Trout Fishing in 2006: A Demographic Description and Economic Analysis, Addendum to the 2006 National Survey of Fishing, Hunting, and Wildlife-Associated Recreation. Report 2006–6*. US Fish and Wildlife Service, Arlington, VA.

**Avoided Sedimentation. Valuation of sediment deposition.**

102. Hansen L, Breneman V, Davison C, Dicken C (2002) The cost of soil erosion to downstream navigation. *J Soil Water Cons* 57:205–212.
103. Hansen L, Ribaud M (2008) *Economic Measures of Soil Conservation Benefits: Regional Values for Policy Assessment. USDA Economic Research Service Technical Bulletin No. 1922* (US Department of Agriculture, Washington, DC).

104. Hansen L, Hellerstein D (2007) The value of the reservoir services gained with soil conservation. *Land Econ* 83:285–301.
105. Southgate D, Macke R (1989) The downstream benefits of soil conservation in third-world hydroelectric watersheds. *Land Econ* 65:38–48.
106. Sude B, et al. (2011) New approach for evaluation of a watershed ecosystem service for avoiding reservoir sedimentation and its economic value: A case study from Ertan reservoir in Yalong River, China. *Appl Environ Soil Sci* 2011:576947.
107. US Army Corps of Engineers (1999) Civil works digital project notebook (DPN). Available at [http://crunch.tec.army.mil/dpn/webpages/dpn\\_intro.cfm](http://crunch.tec.army.mil/dpn/webpages/dpn_intro.cfm). Accessed October 8, 2012.
- Safe drinking water: Dissolved organic carbon (DOC).**
108. Pellerin BA, Hernes PJ, Saraceno J, Spencer RGM, Bergamaschi BA (2010) Microbial degradation of plant leachate alters lignin phenols and trihalomethane precursors. *J Environ Qual* 39:946–954.
109. Chow AT, Dahlgren RA, Harrison JA (2007) Watershed sources of disinfection byproduct precursors in the Sacramento and San Joaquin Rivers, California. *Environ Sci Technol* 41:7645–7652.
110. Engelage SK, Stringfellow WT, Letain T (2009) Disinfection byproduct formation potentials of wetlands, agricultural drains, and rivers and the effect of biodegradation on trihalomethane precursors. *J Environ Qual* 38:1901–1908.
111. Camel V, Bermond A (1998) The use of ozone and associated oxidation processes in drinking water treatment. *Water Res* 32:3208–3222.
112. Legrini O, Oliveros E, Braun A (1993) Photochemical processes for water-treatment. *Chem Rev* 93:671–698.
113. Schlichter B, Mavrov V, Erwe T, Chmiel H (2004) Regeneration of bonding agents loaded with heavy metals by electro dialysis with bipolar membranes. *J Membr Sci* 232:99–105.
114. Pinney M, Westerhoff P, Baker L (2000) Transformations in dissolved organic carbon through constructed wetlands. *Water Res* 34:1897–1911.
115. Hsu C, Jeng W, Chang R, Chien L, Han B (2001) Estimation of potential lifetime cancer risks for trihalomethanes from consuming chlorinated drinking water in Taiwan. *Environ Res* 85:77–82.
116. US Environmental Protection Agency (2011) *Drinking Water Contaminants: National Primary Drinking Water Regulations* (US EPA, Washington, DC).
117. Desimone L, Hamilton P, Gilliom R (2009) *Quality of Water from Domestic Wells in Principal Aquifers of the United States, 1991–2004: Overview of Major Findings. USGS National Water Quality Assessment Program. Scientific Investigations Report 2008–5227* (US Geological Survey, Washington, DC).
- Safe Drinking and/or Contact with Water: Toxins. Toxin exposure and human health.**
118. Easter KW, Konishi Y (2006) What are the economic health costs of nonaction in controlling toxic water pollution? *Water Resour Dev* 22:529–541.
119. Jamieson R, Gordon R, Sharples K, Stratton G, Madani A (2002) Movement and persistence of fecal bacteria in agricultural soils and subsurface drainage water: A review. *Can Biosyst Eng* 44:1.1–1.9.
120. Rusin P, Rose J, Haas C, Gerba C (1997) Risk assessment of opportunistic bacterial pathogens in drinking water. *Rev Environ Contamination Toxicol* 152:58–83.
121. Focazio MJ, et al. (2008) A national reconnaissance for pharmaceuticals and other organic wastewater contaminants in the United States—Untreated drinking water sources. *Sci Total Environ* 402:201–216.
122. Funari E, Testai E (2008) Human health risk assessment related to cyanotoxins exposure. *Crit Rev Toxicol* 38:97–125.
123. Codd G, Morrison L, Metcalf J (2005) Cyanobacterial toxins: Risk management for health protection. *Toxicol Appl Pharmacol* 203:264–272.
124. Codd G (2000) Cyanobacterial toxins, the perception of water quality, and the prioritization of eutrophication control. *Ecol Eng* 16:51–60.
125. de Figueiredo D, Azeiteiro U, Esteves S, Goncalves F, Pereira M (2004) Microcystin-producing blooms—a serious global public health issue. *Ecotoxicol Environ Saf* 59:151–163.
126. Tchounwou P, Patlolla A, Centeno J (2003) Carcinogenic and systemic health effects associated with arsenic exposure—A critical review. *Toxicol Pathol* 31:575–588.
127. Ratnaike R (2003) Acute and chronic arsenic toxicity. *Postgrad Med J* 79:391–396.
128. Rao P, Gupta N, Bhaskar A, Jayaraj R (2002) Toxins and bioactive compounds from cyanobacteria and their implications on human health. *J Environ Biol* 23:215–224.
129. Kolpin D, et al. (2002) Pharmaceuticals, hormones, and other organic wastewater contaminants in US streams, 1999–2000: A national reconnaissance. *Environ Sci Technol* 36:1202–1211.
130. Basu A, Mahata J, Gupta S, Giri A (2001) Genetic toxicology of a paradoxical human carcinogen, arsenic: A review. *Mutat Res Rev Mut Res* 488:171–194.
131. Zahm S, Ward M (1998) Pesticides and childhood cancer. *Environ Health Perspect* 106:893–908.
132. Cantor K (1997) Drinking water and cancer. *Cancer Causes Control* 8:292–308.
133. Pontius F, Brown K, Chen C (1994) Health implications of arsenic in drinking-water. *J Am Water Works Assoc* 86:52–63.
- Toxins exposure via consumption of fish and/or shellfish.**
134. Ibelings BW, Chorus I (2007) Accumulation of cyanobacterial toxins in freshwater “seafood” and its consequences for public health: A review. *Environ Pollut* 150:177–192.
135. Hylander LD, Goodsite ME (2006) Environmental costs of mercury pollution. *Sci Total Environ* 368:352–370.
- Valuation of changes in human health due to unsafe contact or consumption.**
136. Konishi Y, Coggins JS (2006) Value of information and averted behavior: The case of toxic water contamination. Selected paper presented at the AAEA Annual Meeting, Long Beach, California (University of Minnesota, St. Paul). Available at <http://purl.umn.edu/21395>. Accessed October 8, 2012.
137. Svrcek C, Smith D (2004) Cyanobacteria toxins and the current state of knowledge on water treatment options: A review. *J Environ Eng Sci* 3:155–185.
138. Pretty J, et al. (2000) An assessment of the total external costs of U.K. agriculture. *Agr Syst* 65:113–136.
139. Hitzfeld B, Hoger S, Dietrich D (2000) Cyanobacterial toxins: Removal during drinking water treatment, and human risk assessment. *Environ Health Perspect* 108:113–122.
140. Hoeger S, Hitzfeld B, Dietrich D (2005) Occurrence and elimination of cyanobacterial toxins in drinking water treatment plants. *Toxicol Appl Pharmacol* 203:231–242.
141. Revesz R (1999) Environmental regulation, cost-benefit analysis, and the discounting of human lives. *Columbia Law Rev* 99:941–1017.
- Nonuse Value. Research on nonuse values related to water quality.**
142. Johnston R, Besedin E, Wardwell R (2003) Modeling relationships between use and nonuse values for surface wa-

- ter quality: A meta-analysis. *Water Resour Res* 39:1363–1371.
143. Sanders L, Walsh R, Loomis J (1990) Toward empirical estimation of the total value of protecting rivers. *Water Resour Res* 26:1345–1357.
144. Sutherland R, Walsh R (1985) Effect of distance on the preservation value of water-quality. *Land Econ* 61:281–291.
145. Bateman I, Cole M, Georgiou S, Hadley D (2006) Comparing contingent valuation and contingent ranking: A case study considering the benefits of urban river water quality improvements. *J Environ Manage* 79:221–231.
146. Silberman J, Gerlowski D, Williams N (1992) Estimating existence value for users and nonusers of New Jersey beaches. *Land Econ* 68:225–236.
147. Johnston R, Opaluch J, Magnusson G, Mazzotta M (2005) Who are resource nonusers and what can they tell us about nonuse values? Decomposing user and nonuser willingness to pay for coastal wetland restoration. *Water Resour Res* 41:W07017.
148. Brown TC (1993) *Measuring Nonuse Value: A Comparison of Recent Contingent Valuation Studies, W-133 Sixth Interim Rep.*, (US Forest Service, Fort Collins, CO). Available at <http://www.fs.fed.us/rm/value/docs/Brown-nonuse%20value-W133.pdf>. Accessed October 8, 2012.
